# Supplementary material for: A one-pot synthesis of hybrid organo-layered double hydroxide catalyst precursors
Source: Royal Society of Chemistry journal article supplement (doi:10.1039/b605851e), 2006-01-01
Supplement: b605851e.pdf [file b605851e.pdf]

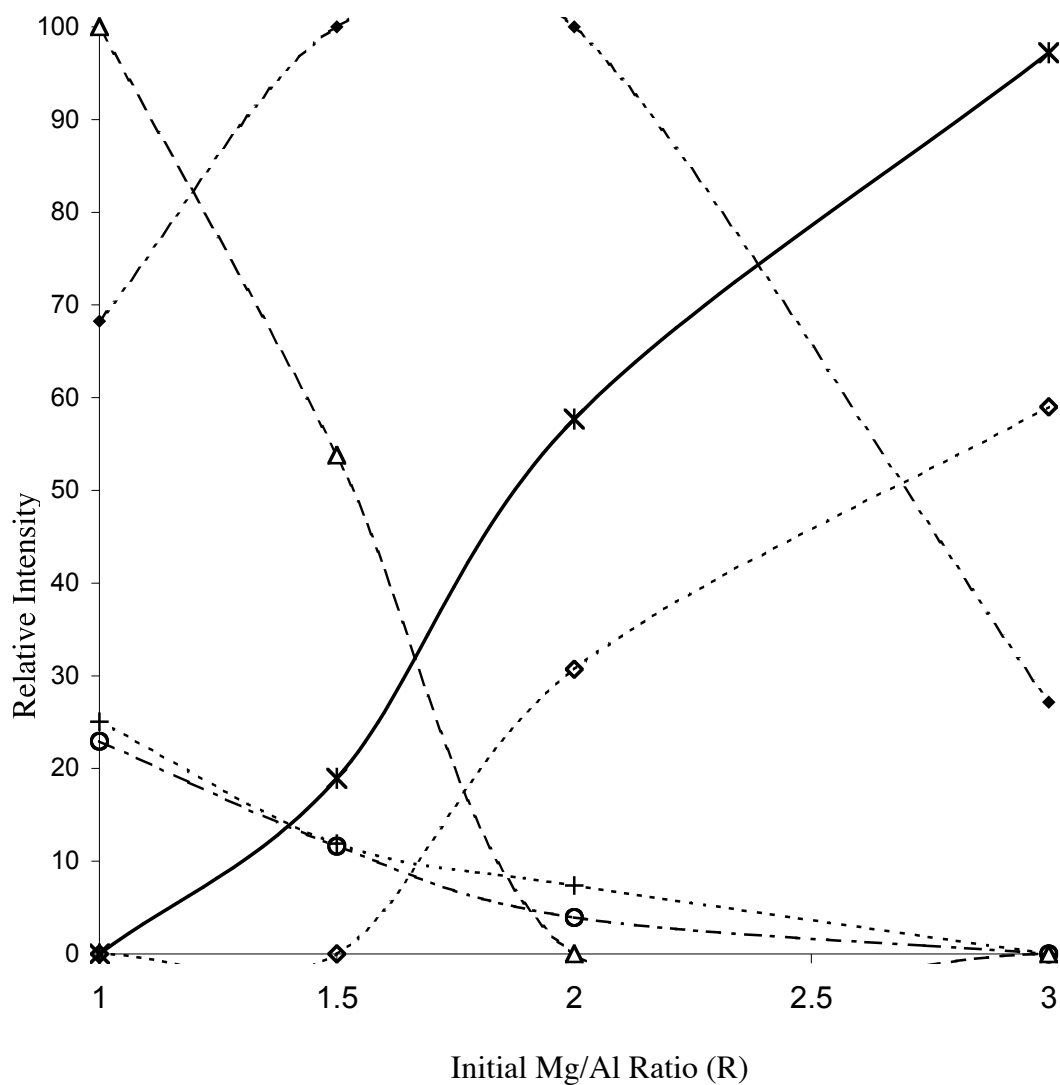

Figure S1. Variation in the relative intensity of reflections of selected impurity and LDH phases with starting Mg/Al ratio. ◆ = LDH 003 reflection; Δ = gibbsite in coprecipitated samples; + = boemite in samples prepared by hydrothermal one-step method with acetate:Al < 1; o = boemite in samples prepared by hydrothermal one-step method with acetate:Al > 1; \* = brucite in samples prepared by atmospheric one-step method with acetate:Al < 1; ◇ = brucite in samples prepared by hydrothermal one-step method with acetate:Al < 1.
